# Supplementary material
Source: Springer Nature journal article supplement (https://www.springermedizin.de/resource/supplementary/12885_2012_4086_MOESM5_ESM.pdf/9465270)

## Males

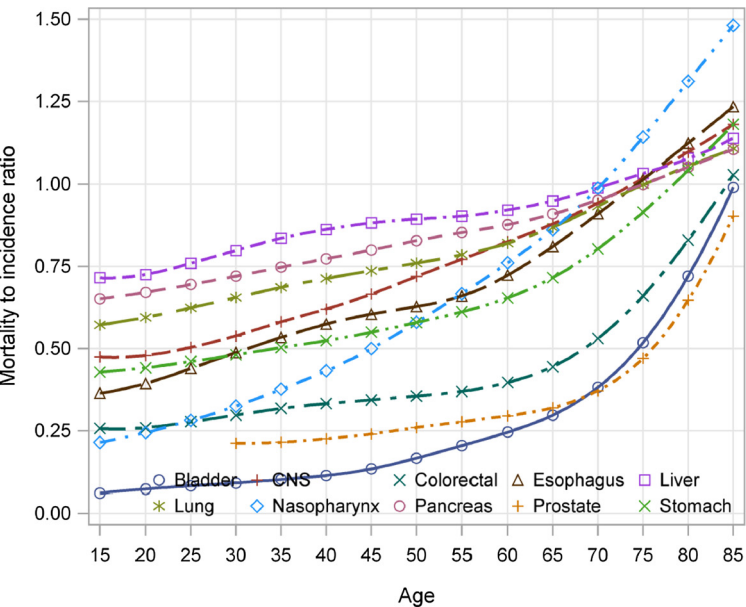

## Females

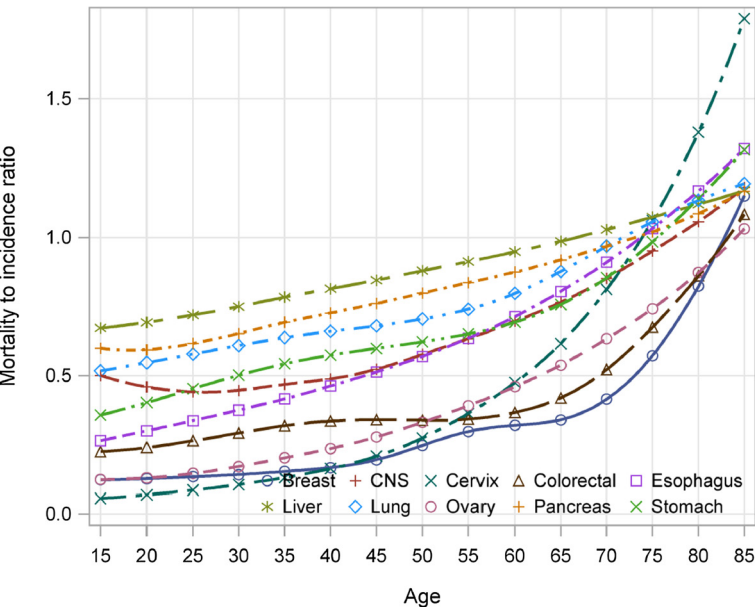

Supplement: MOESM5 [file 9465270]
